# Supplementary material for: Does Early Childhood Caries Increase Caries Development among School Children and Adolescents? A Systematic Review and Meta-Analysis
Source: MDPI journal article supplement (doi:10.3390/ijerph192013459), 2022-10-18
Supplement: s1 [file s1]

**Supplementary file S2. Reasons for exclusion after full text reading**

|   | <b>Reasons for exclusion</b>                                                   | <b>Year</b> | <b>Title</b>                                                                                                                                   | <b>Journal</b>                | <b>Authors</b>                                                                                     |
|---|--------------------------------------------------------------------------------|-------------|------------------------------------------------------------------------------------------------------------------------------------------------|-------------------------------|----------------------------------------------------------------------------------------------------|
| 1 | No relevant data                                                               | 2021        | Development of dental caries and risk factors between 1 and 7 years of age in areas of high risk for dental caries in Stockholm, Sweden.       | Eur Arch Paediatr Dent        | M. Anderson; G. Dahllof; A. Warnqvist; M. Grindefjord.                                             |
| 2 | No differentiation of caries increment between primary and permanent dentition | 2011        | Longitudinal associations between children's dental caries and risk factors                                                                    | J Public Health Dent          | O. Chankanka; J. E. Cavanaugh; S. M. Levy; T. A. Marshall; J. J. Warren; B. Broffitt; J. L. Kolker |
| 3 | Primary dentition (dmft) increment                                             | 2019        | Increase in dental caries and change in the socioeconomic profile of families in a child cohort of the primary health care in Northeast Brazil | BMC Oral Health               | M. de Melo; W. V. de Souza; P. S. A. de Goes                                                       |
| 4 | Participants involved children > 71 months                                     | 1992        | A multivariate model to predict caries increment in Montreal children aged 5 years                                                             | Community Dent Health         | M. Demers; J. M. Brodeur; C. Mouton; P. L. Simard; L. Trahan; G. Veilleux                          |
| 5 | No relevant data                                                               | 1992        | The University of North Carolina Caries Risk Assessment study: further developments in caries risk prediction                                  | Community Dent Oral Epidemiol | J. A. Disney; R. C. Graves; J. W. Stamm; H. M. Bohannon; J. R. Abernathy; D. D. Zack               |
| 6 | Tooth level increment                                                          | 2021        | The Impact of Early Childhood Factors on Dental Caries Incidence in First Permanent Molars: A 7-Year Follow-Up Study.                          | Caries Res.                   | B Emmanuelli; J. K. Knorst; G. R. Menegazzo; F. M. Mendes; T. M. Ardenghi.                         |
| 7 | No differentiation of caries increment                                         | 2012        | The natural history of dental caries lesions: a 4-year observational study                                                                     | J Dent Res                    | A. Ferreira Zandoná; E. Santiago; G. J. Eckert; B. P. Katz; S. Pereira                             |

|    |                                                                                |      |                                                                                                                                                                                      |                            |                                                                                                    |
|----|--------------------------------------------------------------------------------|------|--------------------------------------------------------------------------------------------------------------------------------------------------------------------------------------|----------------------------|----------------------------------------------------------------------------------------------------|
|    | between primary and permanent dentition                                        |      |                                                                                                                                                                                      |                            | de Oliveira; O. R. Capin; M. Mau; D. T. Zero                                                       |
| 8  | Participants involved children > 71 months                                     | 2019 | Models to Predict Future Permanent Tooth Caries Incidence in Children Using Primary Teeth Caries Experience                                                                          | Pediatr Dent               | T. S. Ghazal; N. K. Childers; S. M. Levy                                                           |
| 9  | Primary dentition (dmft) increment                                             | 2022 | Acculturation and 4-year caries increment among children of foreign-born mothers in Sweden: a register-based cohort study.                                                           | BMC oral health            | A. Granlund, A; F. C. Soares; A. Hjern; G. Dahllof; A. Julihn.                                     |
| 10 | No differentiation of caries increment between primary and permanent dentition | 1991 | University of North Carolina caries risk assessment study. III. Multiple factors in caries prevalence                                                                                | J Public Health Dent       | R. C. Graves; J. R. Abernathy; J. A. Disney; J. W. Stamm; H. M. Bohannon                           |
| 11 | Primary dentition (dmft) increment                                             | 1991 | The relationship between caries experience in the deciduous molars at 5 years and in first permanent molars of the same child at 7 years                                             | Community Dent Health      | M. M. Gray; M. D. Marchment; R. J. Anderson                                                        |
| 12 | No differentiation of caries increment between primary and permanent dentition | 2015 | High sucrose intake at 3 years of age is associated with increased salivary counts of mutans streptococci and lactobacilli, and with increased caries rate from 3 to 16 years of age | Caries Res                 | S. Karjalainen; M. Tolvanen; K. Pienihäkkinen; E. Söderling; H. Lagström; O. Simell; H. Niinikoski |
| 13 | No differentiation of caries increment between primary                         | 2022 | Pathways between Social Capital and Oral Health from Childhood to Adolescence.                                                                                                       | Journal of dental research | Knorst, J. K., Brondani, B., Vettore, M. V., Hesse, D., Mendes, F. M., & Ardenghi, T. M.           |

|    |                                                                                |      |                                                                                                                                                                |                                |                                                                                             |
|----|--------------------------------------------------------------------------------|------|----------------------------------------------------------------------------------------------------------------------------------------------------------------|--------------------------------|---------------------------------------------------------------------------------------------|
|    | and permanent dentition                                                        |      |                                                                                                                                                                |                                |                                                                                             |
| 14 | Participants involved children > 71 months                                     | 2006 | Employing dmft score as a risk predictor for caries development in the permanent teeth in Japanese primary school girls                                        | J Oral Sci                     | M. Motohashi; H. Yamada; F. Genkai; H. Kato; T. Imai; S. Sato; A. Sugaya; M. Maeno          |
| 15 | Primary dentition (dmft) increment                                             | 2007 | A seven-year survival analysis of caries onset in primary second molars and permanent first molars in different caries risk groups determined at age two years | Acta Odontologica Scandinavica | P. Ollila; M. Larmas                                                                        |
| 16 | Repeated dataset                                                               | 2008 | Long-term predictive value of salivary microbial diagnostic tests in children                                                                                  | Eur Arch Paediatr Dent         | P. S. Ollila; M. A. Larmas                                                                  |
| 17 | Participants involved children > 71 months at baseline                         | 2015 | Long-term caries development in schoolchildren and the role of educational status                                                                              | Quintessence International     | J. Schmoeckel; R. M. Santamaria; C. H. Splieth                                              |
| 18 | Reporting at tooth level                                                       | 2010 | Modelling childhood caries using parametric competing risks survival analysis methods for clustered data                                                       | Caries Res                     | J. Stephenson; B. L. Chadwick; R. A. Playle; E. T. Treasure                                 |
| 19 | No differentiation of caries increment between primary and permanent dentition | 2011 | Dietary Patterns and Oral Health Behaviours Associated with Caries Development from 4 to 7 Years of Age                                                        | Life (Basel, Switzerland)      | C. C. Silva; S. Gavinha; S. Vilela; R. Rodrigues; M. C. Manso; M. Severo; C. Lopes, P. Melo |
| 20 | No differentiation of caries increment between primary                         | 2019 | Community-level predictors of Australian children's dental caries and injury                                                                                   | Australian Dental Journal      | N. Stormon; P. J. Ford; R. Lalloo                                                           |

|    |                                                        |      |                                                                                                                                       |                              |                                                        |
|----|--------------------------------------------------------|------|---------------------------------------------------------------------------------------------------------------------------------------|------------------------------|--------------------------------------------------------|
|    | and permanent dentition                                |      |                                                                                                                                       |                              |                                                        |
| 21 | Repeated dataset                                       | 2020 | Family-Level Predictors of Australian Children's Dental Caries and Injuries                                                           | Pediatr Dent                 | N. Stormon; P. J. Ford; R. Lalloo                      |
| 22 | Participants involved children > 71 months at baseline | 2021 | Childhood Factors and Dental Caries in the Permanent Dentition: Findings of an 8-Year Study Under a Nationwide School Dental Service. | International Dental Journal | S. H. X. Tan; Y. Y. Teo; M. H. X. Tan; Gao, X. (2021). |
