# Supplementary material for: Does Early Childhood Caries Increase Caries Development among School Children and Adolescents? A Systematic Review and Meta-Analysis
Source: MDPI journal article supplement (doi:10.3390/ijerph192013459), 2022-10-18
Supplement: s1 [file s1]

## **Supplementary file S1. Search strategy**

### **PubMed**

**Searched on 28 Jul 2022**

**Results: 839**

(((((("Dental Caries"[Mesh]) OR (carie\*[Text Word] OR carious[Text Word] OR DMF[Text Word])) OR ((dental[Text Word] OR tooth[Text Word] OR teeth[Text Word] OR enamel[Text Word] OR dentin\*[Text Word]) AND (decay\*[Text Word] OR cavit\*[Text Word] OR deminerali\*[Text Word] OR reminerali\*[Text Word] OR "white spot"[Text Word]))) AND (((("Infant"[Mesh]) OR "Child"[Mesh]) OR (child\*[Text Word] OR infant\*[Text Word]))) AND (("Risk Factors"[Mesh:NoExp]) OR ((risk[Text Word]) AND (factor\*[Text Word] OR predictor\*[Text Word] OR predicator\*[Text Word])))) AND (((("Cohort Studies"[Mesh]) OR "Case-Control Studies"[Mesh]) OR (longitudinal studies[Text Word] OR follow-up studies[Text Word] OR case-control studies[Text Word] OR cohort studies[Text Word] OR prospective studies[Text Word]))

### **Ovid Medline**

**Ovid MEDLINE(R) and Epub Ahead of Print, In-Process, In-Data-Review & Other Non-Indexed Citations, Daily and Versions(R) 1946 to February 26, 2021**

**Searched on 28 Jul 2022**

**Results: 746**

1. exp Dental Caries/
2. (carie\* or carious or DMF).tw.
3. ((dental or tooth or teeth or enamel or dentin\*) and (decay\* or cavit\* or deminerali\* or reminerali\* or "white spot\*")).tw.
4. 1 or 2 or 3
5. exp Infant/ or exp Child/
6. (child\* or infant\*).tw.
7. 5 or 6
8. Risk Factors/
9. (risk and (factor\* or predictor\* or predicator\*)).tw.
10. 8 or 9
11. exp Cohort Studies/ or exp Case-Control Studies/
12. (longitudinal studies or follow-up studies or case-control studies or cohort studies or prospective studies).tw.
13. 11 or 12
14. 4 and 7 and 10 and 13

### **Embase**

**Embase Classic+Embase 1947 to 2021 February 26**

**Searched on 28 Jul 2022**

**Results: 380**

1. exp dental caries/
2. (carie\*or carious or DMF).tw.
3. ((dental or tooth or teeth or enamel or dentin\*) and (decay\* or cavit\* or deminerali\* or reminerali\* or "white spot\*")).tw.
4. 1 or 2 or 3
5. exp Infant/ or exp Child/
6. (child\* or infant\*).tw.
7. 5 or 6
8. Risk Factor/
9. (risk and (factor\* or predictor\* or predictor\*)).tw.
10. 8 or 9
11. exp cohort analysis/ or exp case control study/
12. (longitudinal studies or follow-up studies or case-control studies or cohort studies or prospective studies).tw.
13. 11 or 12
14. 4 and 7 and 10 and 13

#### **Web of Science**

**Searched on 28 Jul 2022**

**Results: 633**

TS=((dental caries OR carie\* OR carious OR DMF) OR ((dental OR tooth OR teeth OR enamel OR dentin\*) AND (decay\* or cavit\* or deminerali\* or reminerali\* or "white spot\*")))  
AND TS=(child\* OR infant\*)  
AND TS=(longitudinal studies OR follow-up studies OR case control studies OR cohort studies OR prospective studies)  
AND TS=(risk AND (factor\* OR predictor\* OR predictor\*))  
CI-SSH, ESCI Timespan=All years
